# Supplementary material for: Parallel homodimer structures of the extracellular domains of the voltage-gated sodium channel β4 subunit explain its role in cell–cell adhesion
Source: PubMed Central journal article supplement (PMC5555201; doi:10.1074/jbc.m117.786509), 2017-06-27
Supplement: 10.1074_M117.786509_jbc.M117.786509-1.pdf [file 10.1074_M117.786509_jbc.M117.786509-1.pdf]

## SUPPLEMENTAL DATA

### **Parallel homodimer structures of the extracellular domains of the voltage-gated sodium channel $\beta 4$ subunit explain its role in cell-cell adhesion**

**Hideaki Shimizu<sup>1,2,3</sup>, Asako Tosaki<sup>3</sup>, Noboru Ohsawa<sup>1,2</sup>, Yoshiko Ishizuka-Katsura<sup>1,2</sup>, Shisako Shoji<sup>1,2</sup>, Haruko Miyazaki<sup>3,4,5</sup>, Fumitaka Oyama<sup>3,6</sup>, Takaho Terada<sup>1,7</sup>, Mikako Shirouzu<sup>1,2</sup>, Shun-ichi Sekine<sup>1,2</sup>, Nobuyuki Nukina<sup>3,4,5</sup> and Shigeyuki Yokoyama<sup>1,7</sup>**

<sup>1</sup> RIKEN Systems and Structural Biology Center, Tsurumi, Yokohama 230-0045, Japan

<sup>2</sup> RIKEN Center for Life Science Technologies, Tsurumi, Yokohama 230-0045, Japan

<sup>3</sup> Laboratory for Structural Neuropathology, RIKEN Brain Science Institute, Wako, Saitama 351-0198, Japan

<sup>4</sup> Department of Neuroscience for Neurodegenerative Disorders, Juntendo University Graduate School of Medicine, Tokyo 113-8421, Japan

<sup>5</sup> Laboratory of Structural Neuropathology, Doshisha University Graduate School of Brain Science, 1-3 Tatara Miyakodani, Kyotanabe-shi, Kyoto 610-0394, Japan

<sup>6</sup> Department of Chemistry and Life Science, Kogakuin University, Hachioji, Tokyo 192-0015, Japan

<sup>7</sup> RIKEN Structural Biology Laboratory, Tsurumi, Yokohama 230-0045, Japan

## SUPPLEMENTAL FIGURE LEGENDS

**SUPPLEMENTAL FIGURE S1. Electron densities ( $2Fo-Fc$  composite omit map contoured at  $1.5 \sigma$ ) of the N-terminal segments of the mouse and human  $\beta 4ex$  structures.**

**SUPPLEMENTAL FIGURE S2. Full-length blots and gels presented in the main figures.**

## SUPPLEMENTAL TABLE LEGENDS

**SUPPLEMENTAL TABLE S1. Data collection and refinement statistics.**

# Supplemental Figure S1

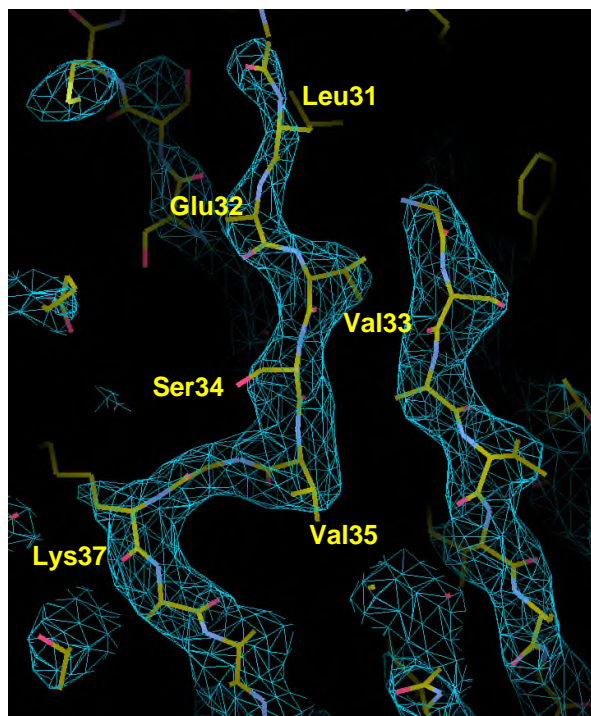

Mouse  $\beta 4$  cubic form

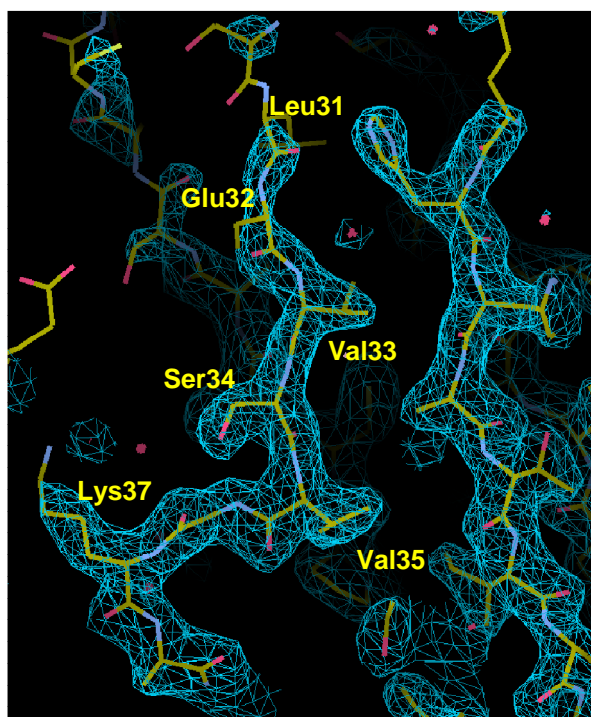

Human  $\beta 4$  hexagonal form

# Supplemental Figure S2

**Fig. 4**

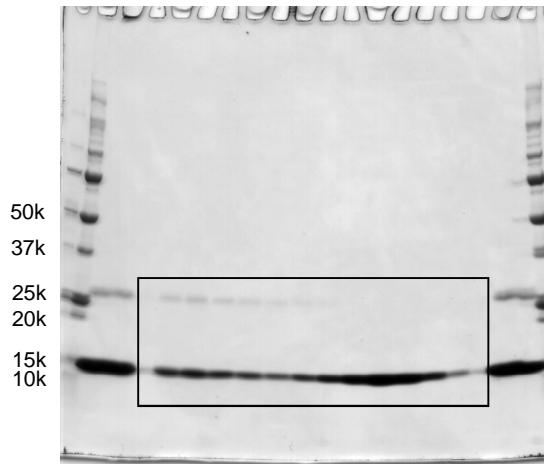

**Fig. 5A**

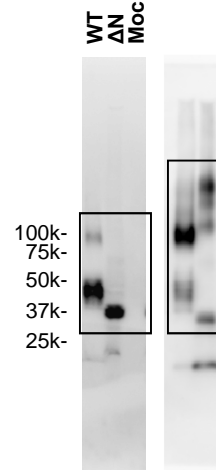

**Fig. 5F**

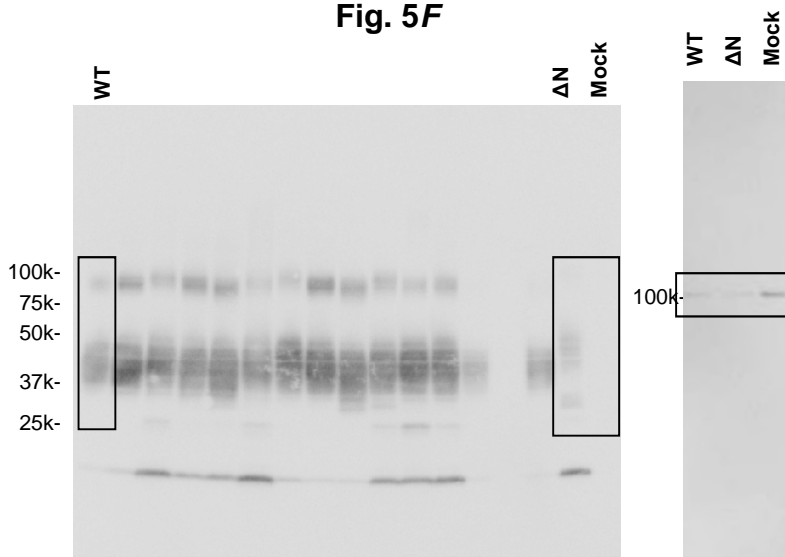

**Fig. 6B**

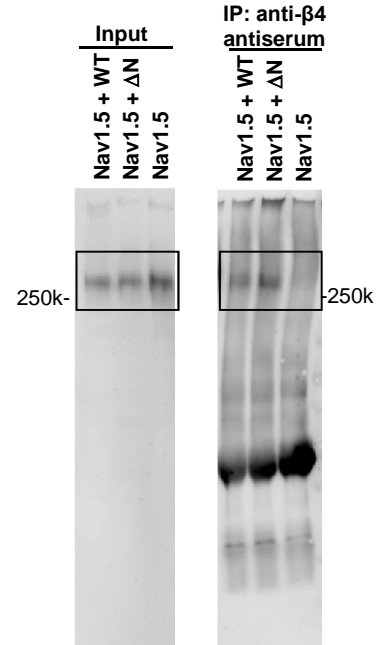

**Fig. 6C**

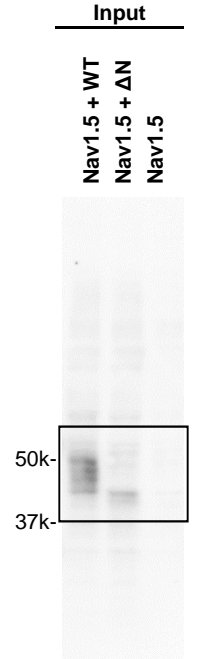

**Supplemental Table S1**

|                                                  | Mouse $\beta$ 4<br>cubic form      | Human $\beta$ 4<br>hexagonal form |
|--------------------------------------------------|------------------------------------|-----------------------------------|
| <b>Data collection</b>                           |                                    |                                   |
| Space group                                      | <i>I</i> 23                        | <i>P</i> 32                       |
| Unit-cell parameters ( $\text{\AA}$ , $^\circ$ ) | 131.5, 131.5, 131.5,<br>90, 90, 90 | 57.1, 57.1, 72.0,<br>90, 90, 120  |
| Resolution ( $\text{\AA}$ )                      | 100–2.9 (3.00–2.9)                 | 100–2.1 (2.18–2.1)                |
| $R_{\text{sym}}$ (%)                             | 8.6 (143.5)                        | 7.3 (47.4)                        |
| $I/\sigma(I)$                                    | 31.4 (1.8)                         | 32.5 (1.7)                        |
| Completeness (%)                                 | 99.6 (100)                         | 97.4 (79.4)                       |
| Redundancy                                       | 7.9 (8.0)                          | 6.4 (3.1)                         |
| CC <sub>1/2</sub>                                | 0.999 (0.545)                      | 0.998 (0.846)                     |
| <b>Refinement</b>                                |                                    |                                   |
| Resolution ( $\text{\AA}$ )                      | 35.2–2.9 (3.08–2.9)                | 29.1–2.1 (2.17–2.1)               |
| No. reflections                                  | 8526 (1267)                        | 14834 (1045)                      |
| $R_{\text{work}}/R_{\text{free}}$ (%)            | 24.6/30.0 (34.6/39.2)              | 20.4/26.4 (24.5/34.9)             |
| No. atoms                                        |                                    |                                   |
| Protein                                          | 1885                               | 1765                              |
| Water                                            | 0                                  | 41                                |
| Ligand                                           | 6                                  | 95                                |
| B-factor ( $\text{\AA}^2$ )                      |                                    |                                   |
| Protein                                          | 90.4                               | 50.7                              |
| Water                                            | -                                  | 53.6                              |
| Ligand                                           | 59.0                               | 53.9                              |
| R.m.s. deviations                                |                                    |                                   |
| Bond lengths ( $\text{\AA}$ )                    | 0.005                              | 0.007                             |
| Bond angles ( $^\circ$ )                         | 0.978                              | 0.964                             |
| Ramachandran plot                                |                                    |                                   |
| Favored (%)                                      | 91.2                               | 97.6                              |
| Outliers (%)                                     | 0.4                                | 0                                 |

Values in parentheses are for the highest-resolution shell.
